# Supplementary material for: Comparative Rice Bran Metabolomics across Diverse Cultivars and Functional Rice Gene–Bran Metabolite Relationships
Source: MDPI journal article supplement (doi:10.3390/metabo8040063), 2018-10-09
Supplement: s1 [file s1]

Supplementary Table 3. Metabolic pathway enrichment scores (PES) for discriminating metabolites between rice bran varieties

| Rice Cultivar        |                                                | Kenya – Basmati 217 | Kenya – Basmati 370 | Mali – Gambiaka | Mali – Shwetasoke | Mali – DM-16 | Mali – Khao Gaew | Nicaragua – Dorado | Nepal – Sawa Mahsuli | India – Chennai | India – Njavara | USA – Calrose | USA – RBT 300 | USA – Jasmine 85 | USA – IAC 600 | USA – LTH | USA – SHZ-2 | Cambodia – Rang Jey |
|----------------------|------------------------------------------------|---------------------|---------------------|-----------------|-------------------|--------------|------------------|--------------------|----------------------|-----------------|-----------------|---------------|---------------|------------------|---------------|-----------|-------------|---------------------|
| Chemical class       | Metabolic Pathway                              |                     |                     |                 |                   |              |                  |                    |                      |                 |                 |               |               |                  |               |           |             |                     |
| Amino acid           | Aromatic amino acid metabolism (PEP derived)   | 1.0                 | 1.0                 | 1.0             | 1.0               | <b>24.8</b>  | 1.0              | 1.0                | 1.0                  | 1.0             | <b>1.7</b>      | 1.0           | 1.0           | 1.0              | 1.0           | 1.0       | 1.0         | <b>2.4</b>          |
|                      | Aspartate family (OAA derived)                 | 1.0                 | 1.0                 | 1.0             | 1.0               | 1.0          | <b>1.6</b>       | 1.0                | <b>1.2</b>           | <b>3.9</b>      | <b>1.1</b>      | 1.0           | 1.0           | 1.0              | <b>1.5</b>    | 1.0       | 1.0         | 1.0                 |
|                      | Glutamate family (alpha-ketoglutarate derived) | 1.0                 | 1.0                 | <b>6.9</b>      | 1.0               | 1.0          | 1.0              | 1.0                | 1.0                  | <b>0.9</b>      | <b>2.1</b>      | 1.0           | 1.0           | 1.0              | 1.0           | 1.0       | 1.0         | 1.0                 |
|                      | Serine family (phosphoglycerate derived)       | 1.0                 | 1.0                 | 1.0             | 1.0               | 1.0          | 1.0              | 1.0                | <b>6.0</b>           | 1.0             | <b>2.9</b>      | 1.0           | 1.0           | 1.0              | 1.0           | 1.0       | 1.0         | 1.0                 |
| Carbohydrate         | Amino sugar and nucleotide sugar               | <b>2.9</b>          | 1.0                 | 1.0             | 1.0               | 1.0          | <b>20.3</b>      | 1.0                | 1.0                  | 1.0             | <b>0.7</b>      | 1.0           | 1.0           | 1.0              | 1.0           | 1.0       | 1.0         | 1.0                 |
|                      | TCA cycle                                      | 1.0                 | 1.0                 | 1.0             | 1.0               | 1.0          | 1.0              | 1.0                | 1.0                  | 1.0             | <b>9.9</b>      | <b>7.4</b>    | 1.0           | 1.0              | <b>6.8</b>    | 1.0       | 1.0         | <b>1.2</b>          |
| Cofactors & vitamins | Tocopherol metabolism                          | 1.0                 | 1.0                 | 1.0             | 1.0               | 1.0          | 1.0              | 1.0                | <b>9.6</b>           | 1.0             | 1.0             | 1.0           | 1.0           | 1.0              | 1.0           | 1.0       | 1.0         | 1.0                 |
| Lipids               | Free fatty acid                                | 1.0                 | 1.0                 | 1.0             | 1.0               | 1.0          | 1.0              | 1.0                | 1.0                  | <b>2.5</b>      | 1.0             | 1.0           | <b>3.1</b>    | 1.0              | 1.0           | 1.0       | 1.0         | 1.0                 |
|                      | Glycerolipids (diacyl)                         | 1.0                 | 1.0                 | 1.0             | 1.0               | 1.0          | 1.0              | 1.0                | 1.0                  | <b>1.2</b>      | 1.0             | 1.0           | <b>12.8</b>   | <b>4.1</b>       | 1.0           | 1.0       | 1.0         | <b>2.1</b>          |
|                      | Glycerolipids (monoacyl)                       | 1.0                 | 1.0                 | 1.0             | 1.0               | 1.0          | 1.0              | 1.0                | 1.0                  | <b>3.6</b>      | 1.0             | 1.0           | <b>5.7</b>    | 1.0              | 1.0           | 1.0       | 1.0         | 1.0                 |
|                      | Lyso-phospholipids                             | 1.0                 | 1.0                 | 1.0             | 1.0               | 1.0          | 1.0              | 1.0                | 1.0                  | 1.0             | 1.0             | 1.0           | 1.0           | 1.0              | 1.0           | 1.0       | 1.0         | <b>3.6</b>          |
|                      | Oxylipins                                      | 1.0                 | 1.0                 | 1.0             | 1.0               | 1.0          | 1.0              | 1.0                | 1.0                  | 1.0             | 1.0             | 1.0           | <b>6.5</b>    | 1.0              | 1.0           | 1.0       | 1.0         | 1.0                 |
|                      | Phospholipid Metabolism                        | 1.0                 | 1.0                 | 1.0             | 1.0               | 1.0          | 1.0              | 1.0                | 1.0                  | 1.0             | <b>4.6</b>      | 1.0           | 1.0           | 1.0              | 1.0           | 1.0       | 1.0         | 1.0                 |
| Nucleotide           | Purine metabolism                              | 1.0                 | 1.0                 | 1.0             | 1.0               | 1.0          | <b>1.1</b>       | 1.0                | 1.0                  | 1.0             | 1.0             | 1.0           | <b>1.4</b>    | 1.0              | 1.0           | 1.0       | 1.0         | <b>2.7</b>          |
| Secondary metabolism | Benzenoids                                     | 1.0                 | 1.0                 | 1.0             | 1.0               | 1.0          | <b>3.2</b>       | 1.0                | 1.0                  | 1.0             | 1.0             | 1.0           | 1.0           | 1.0              | 1.0           | 1.0       | 1.0         | <b>4.3</b>          |

PES greater or less than 1.0 is notable (bolded) and it indicates that the metabolic pathway contains at least 1 metabolite with significant Z-score (Z-score > |2.0|), i.e., level of expression for that metabolite is different from the rest of cultivars for the same metabolites across the metabolic pathway.
